# Supplementary material for: Micelle-Triggered β-Hairpin to α-Helix Transition in a 14-Residue Peptide from a Choline-Binding Repeat of the Pneumococcal Autolysin LytA
Source: PubMed Central journal article supplement (PMC4471590; doi:10.1002/chem.201500447), 2015-04-27
Supplement: chem0021-8076-sd1.pdf [file chem0021-8076-sd1.pdf]

# CHEMISTRY

## A **European** Journal

### Supporting Information

#### **Micelle-Triggered $\beta$ -Hairpin to $\alpha$ -Helix Transition in a 14-Residue Peptide from a Choline-Binding Repeat of the Pneumococcal Autolysin LytA**

Héctor Zamora-Carreras,<sup>[a]</sup> Beatriz Maestro,<sup>[b]</sup> Erik Strandberg,<sup>[c]</sup> Anne S. Ulrich,<sup>[c, d]</sup>  
Jesús M. Sanz,<sup>[b]</sup> and M. Ángeles Jiménez\*<sup>[a]</sup>

chem\_201500447\_sm\_miscellaneous\_information.pdf

## Supporting information

### List of Figures:

Figure S1. Reversibility of the thermal unfolding of LytA<sub>239-252</sub> monitored by CD

Figure S2. <sup>13</sup>C profiles for LytA<sub>239-252</sub>

Figure S3. LytA<sub>239-252</sub> interaction with DPC examined by CD

Figure S4. <sup>1</sup>H, <sup>13</sup>C-HSQC spectra showing the cross-peaks for the aromatic residues of LytA<sub>239-252</sub>

Figure S5. NOE summary for LytA<sub>239-252</sub> in 30 mM DPC-d38

Figure S6. Effect of paramagnetic compounds on 2D <sup>1</sup>H, <sup>1</sup>H-TOCSY spectra of LytA<sub>239-252</sub> in 30 mM DPC-d38

Figure S7. Cartoon representation of a hypothetical model for LytA<sub>239-252</sub> helix/DPC micelles complex compatible with fluorescence and NMR data.

Figure S8. <sup>13</sup>C profiles for SESYW11 and SESYV11

Figure S9. Distribution of aromatic/hydrophobic and polar/charged side chains in the β-hairpin and in a putative helix for peptide SESYW11

Figure S10. Structure of LytA<sub>239-252</sub> in SDS micelles

### List of Tables:

Table S1. <sup>1</sup>H and <sup>13</sup>C chemical shifts for LytA<sub>239-252</sub> in different solvent conditions at pH 3.0 and 25°C

Table S2. Structural statistics parameters for the ensemble of the 20 lowest target function conformers calculated for peptide LytA<sub>239-252</sub> in aqueous solution and in micelles.

Table S3. <sup>1</sup>H and <sup>13</sup>C chemical shifts for peptide SESYV11 in 30 mM DPC

Table S4. <sup>1</sup>H and <sup>13</sup>C chemical shifts for peptide SESYV11 in 30 mM DPC

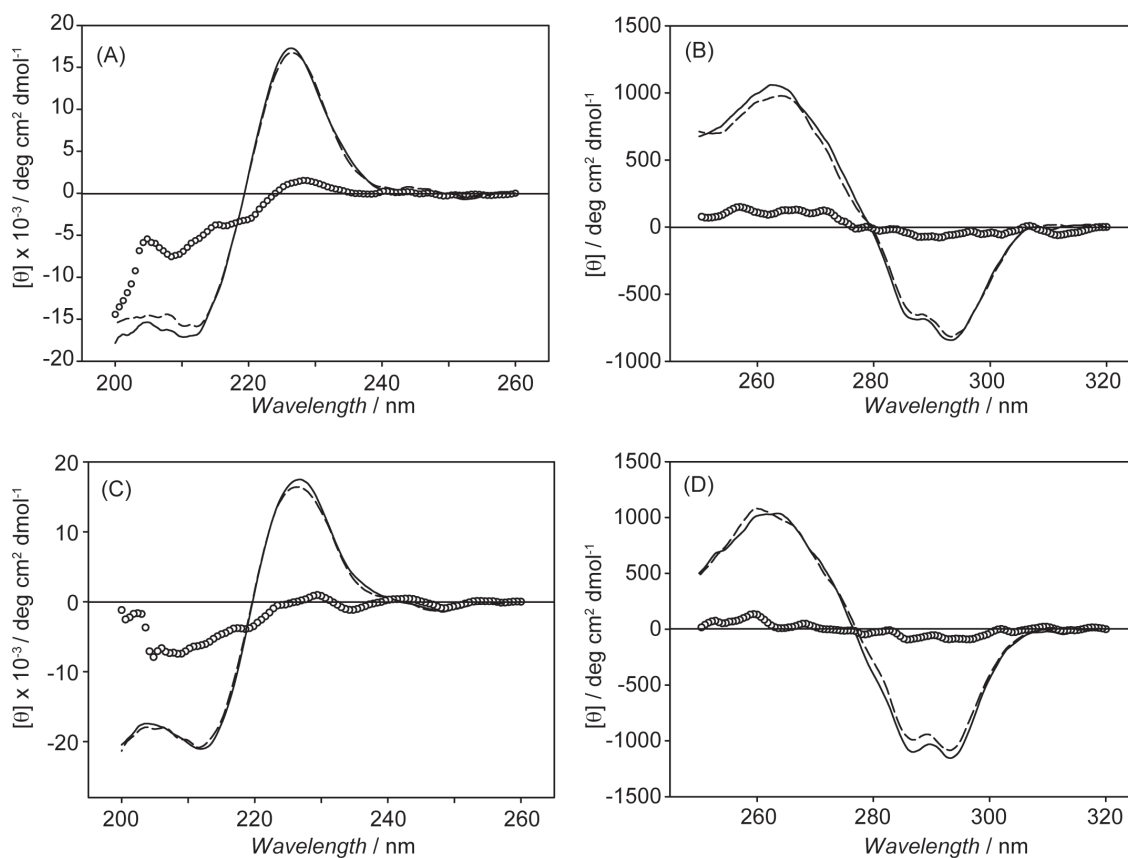

**Figure S1. Reversibility of the thermal unfolding of LytA<sub>239-252</sub> monitored by CD.** Panels A and B, far-UV and near-UV CD spectra, respectively, of LytA<sub>239-252</sub> recorded at 5 °C prior to heating (solid line), 90 °C (circles) and 5 °C after heating (dashed line), in 20 mM glycine buffer, pH 3.0; Panels C and D, same as above but in the presence of 500 mM choline.

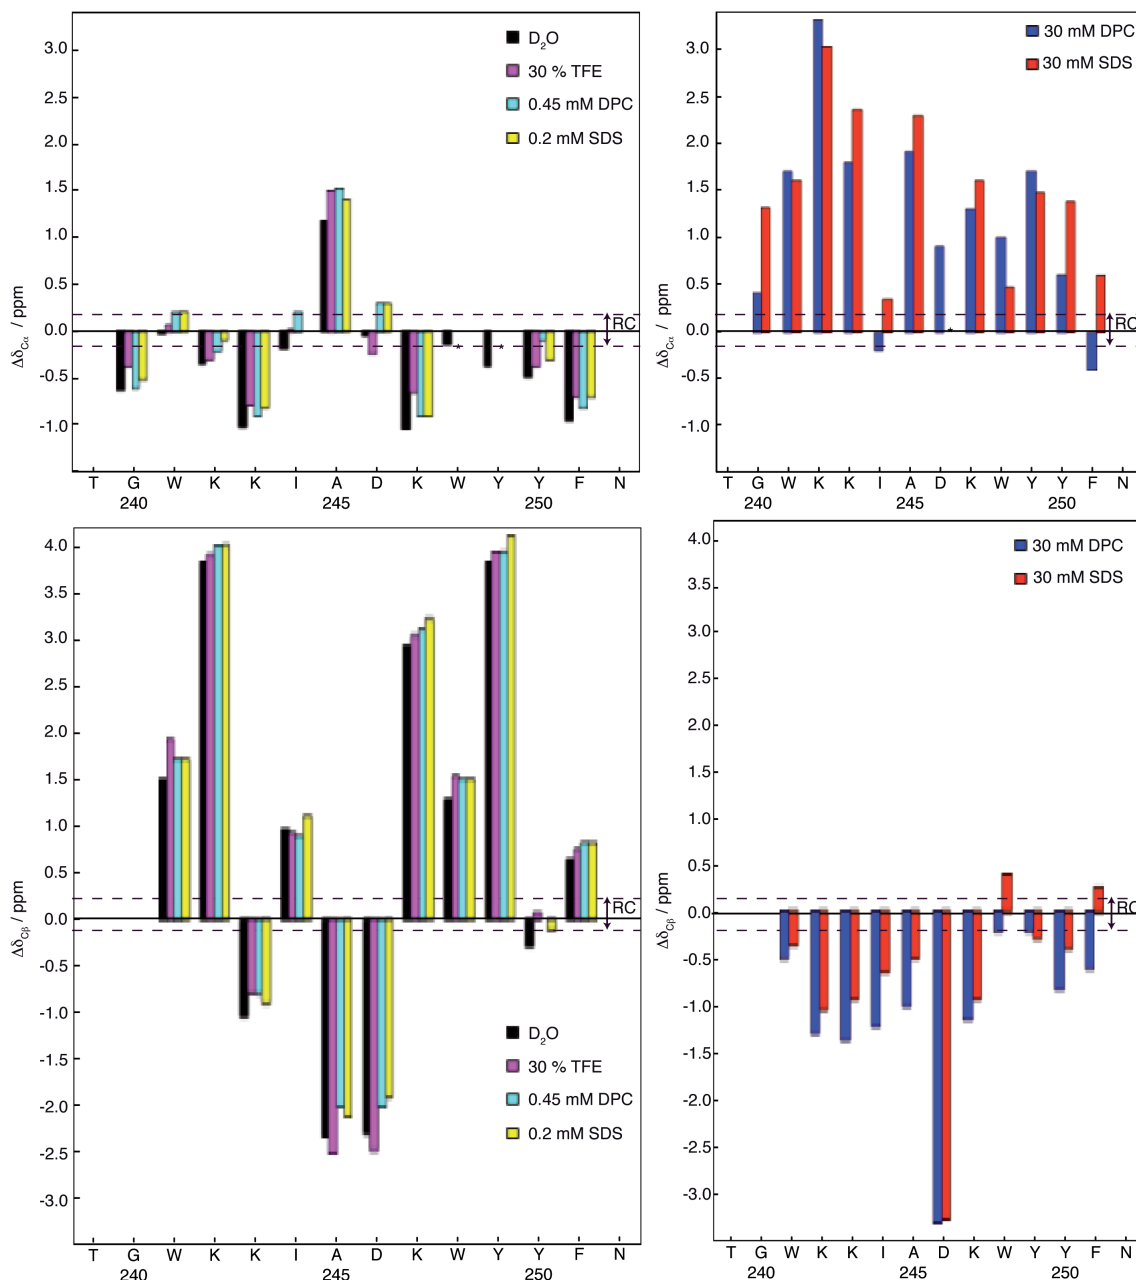

**Figure S2.** Bar plots of  $\Delta\delta_{C\alpha}$  ( $\Delta\delta_{C\alpha} = \delta_{C\alpha}^{\text{observed}} - \delta_{C\alpha}^{\text{RC}}$ , ppm) and  $\Delta\delta_{C\beta}$  ( $\Delta\delta_{C\beta} = \delta_{C\beta}^{\text{observed}} - \delta_{C\beta}^{\text{RC}}$ , ppm) as a function of peptide sequence for LytA<sub>239-252</sub> in different solvent conditions at pH 3.0 and 25 °C. Bars colours for each solvent condition are indicated.  $\delta_{C\alpha}^{\text{RC}}$  and  $\delta_{C\beta}^{\text{RC}}$  values were taken from Wishart et al., *J. Biomol. NMR* 1995, 5, 67-81. The N- and C-terminal residues are not shown. The discontinuous lines indicate the random coil (RC) range, and the asterisks that the corresponding  $\delta_{C\alpha}$  values were not determined.

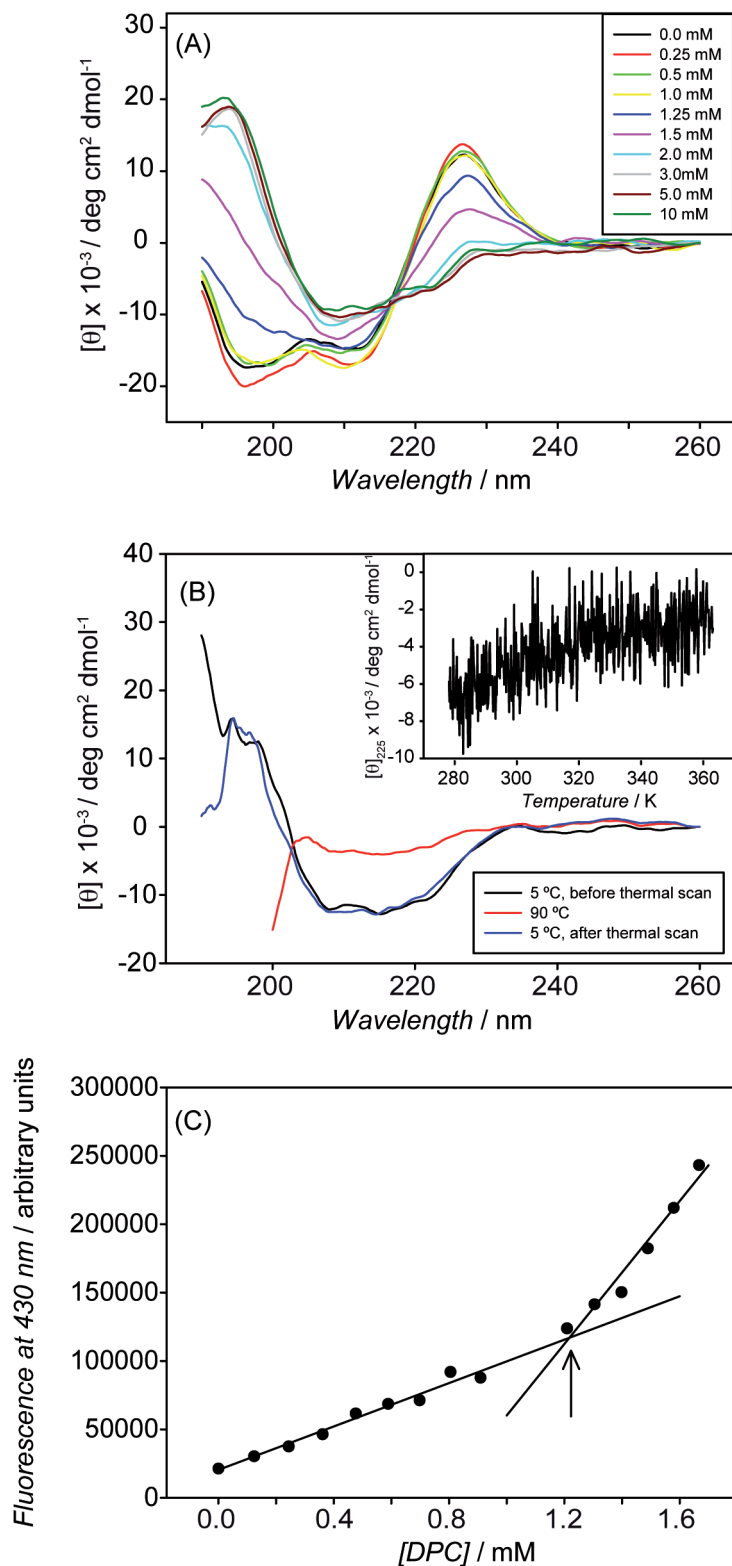

**Figure S3. LytA<sub>239-252</sub> interaction with DPC examined by CD.** (A) Far-UV CD-monitored titration of the peptide with DPC; (B) Thermal unfolding of LytA<sub>239-252</sub> in the presence of 30 mM DPC; far-UV CD spectra recorded at 5 °C (black line), then at 90 °C (red line) and finally at 5 °C after cooling down the sample (blue line). *Inset*, temperature dependence of the ellipticity at 225 nm; (C) Determination of the critical micelle concentration of DPC in 20 mM Gly buffer, pH 3.0, using DPH as probe (see Materials and Methods). The arrow points to the determined cmc value.

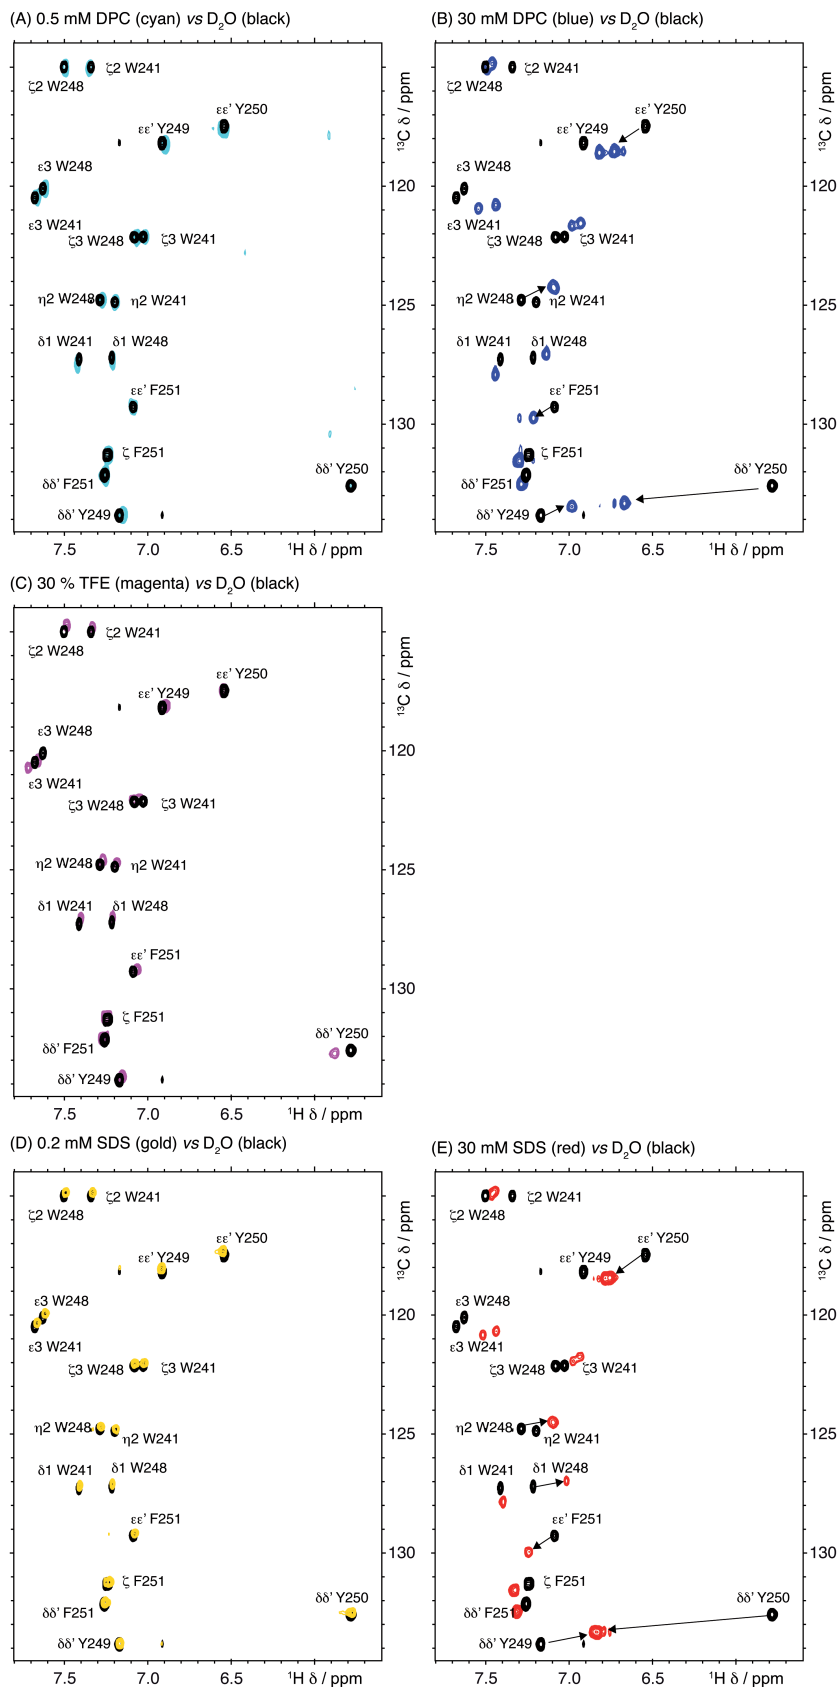

**Figure S4.** 2D  $^1\text{H}$ ,  $^{13}\text{C}$ -HSQC spectral region showing the cross-peaks corresponding to the aromatic rings of Trp, Tyr and Phe residues recorded for LytA<sub>239-252</sub>. (A) Spectra in D<sub>2</sub>O (black contours) overlaid onto spectra in 0.5 mM DPC-d<sub>38</sub> (cyan contours); (B) D<sub>2</sub>O (black contours) onto 30 mM DPC-d<sub>38</sub> (blue contours); (C) D<sub>2</sub>O (black contours) onto 30% TFE (magenta contours); (D) 0.2 mM SDS-d<sub>25</sub> (gold contours) onto D<sub>2</sub>O (black contours); and (E) D<sub>2</sub>O (black contours) onto 30 mM SDS-d<sub>25</sub> (red contours). All at pH 3.0 and 25°C.

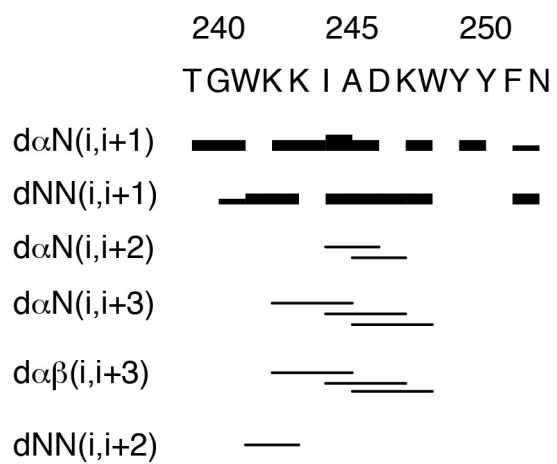

**Figure S5.** NOE summary for LytA<sub>239-252</sub> in 30 mM DPC-d<sub>38</sub>, pH 3.0

(A) 0.0 mM (black) vs 1.4 mM (red)  
 $\text{MnCl}_2$

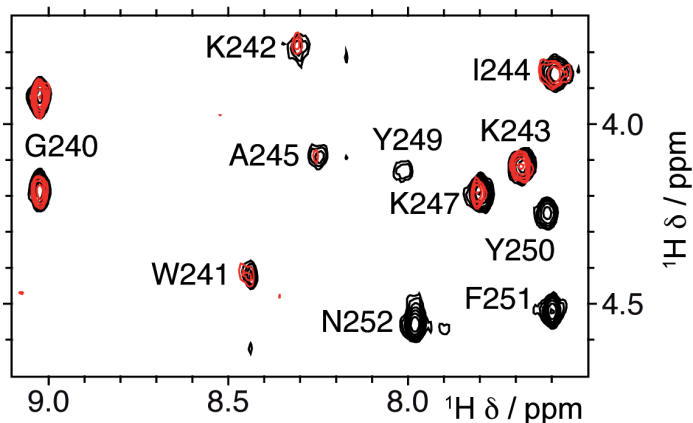

(B) 0.0 mM (black) vs 0.37 mM (green)  
methyl-16-doxy stearate

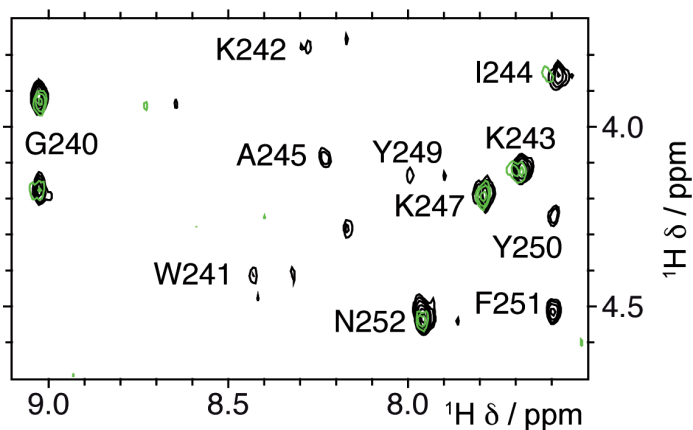

(C) 0.0 mM (black) vs 0.74 mM (cyan)  
5-doxy stearic acid

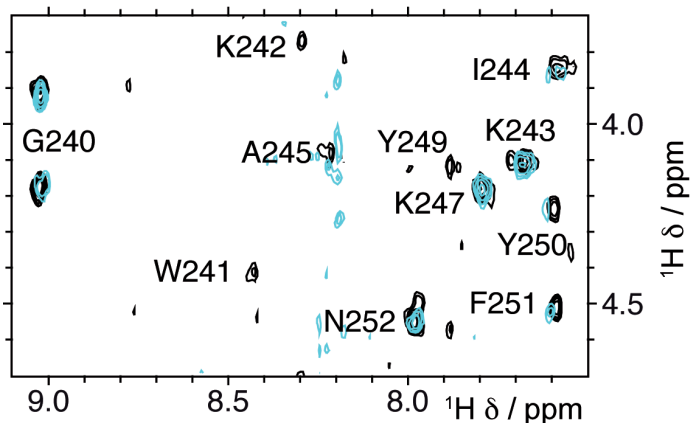

**Figure S6.** Effect of paramagnetic compounds in 2D  $^1\text{H}$ ,  $^1\text{H}$ -TOCSY spectra of 0.5 mM  $\text{LytA}_{239-252}$  in 30 mM  $\text{DPC-d}_{38}$  in  $\text{H}_2\text{O}/\text{D}_2\text{O}$  9:1 (v/v) pH 3.0 at 25 °C. (A)  $\text{MnCl}_2$  (B) methyl-16-doxy stearate; and (C) 5-doxy stearic acid.



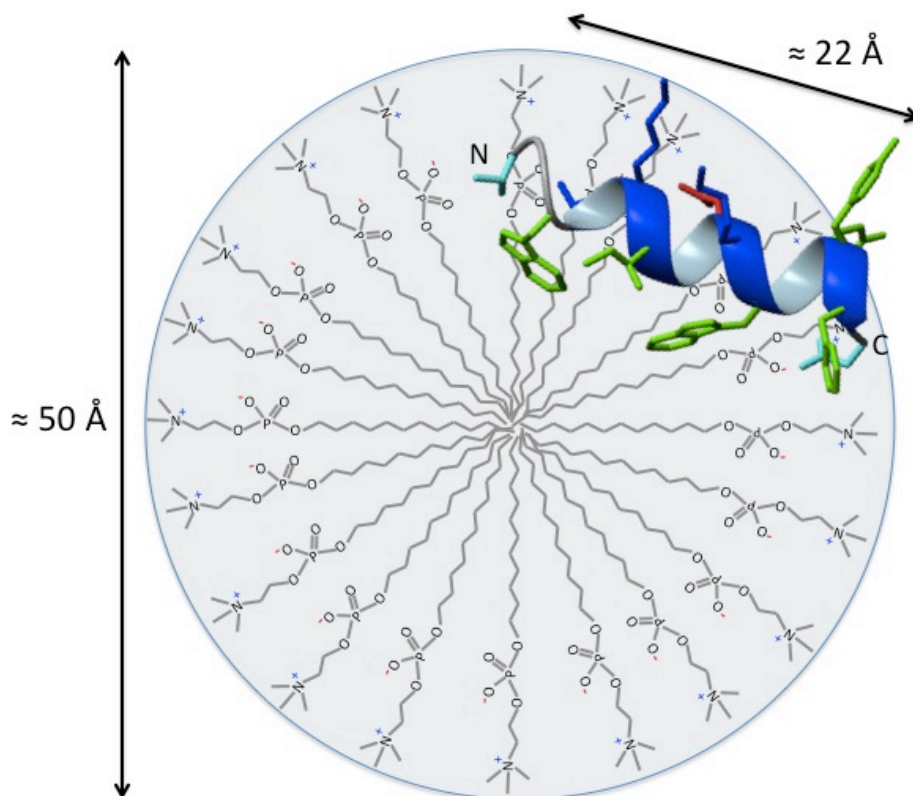

**Figure S7. Cartoon representation of a hypothetical model for LytA<sub>239-252</sub> / DPC micelle complex.** LytA<sub>239-252</sub> helix is displayed as a blue ribbon, and side chains in neon. Positively charged residues are in blue, negatively charged in red, Asn and Thr in cyan, and aromatic and hydrophobic in green. The amino and carboxylate termini are labelled by 'N' and 'C', respectively. The approximate lengths of the micelle diameter and LytA<sub>239-252</sub> helix are indicated.

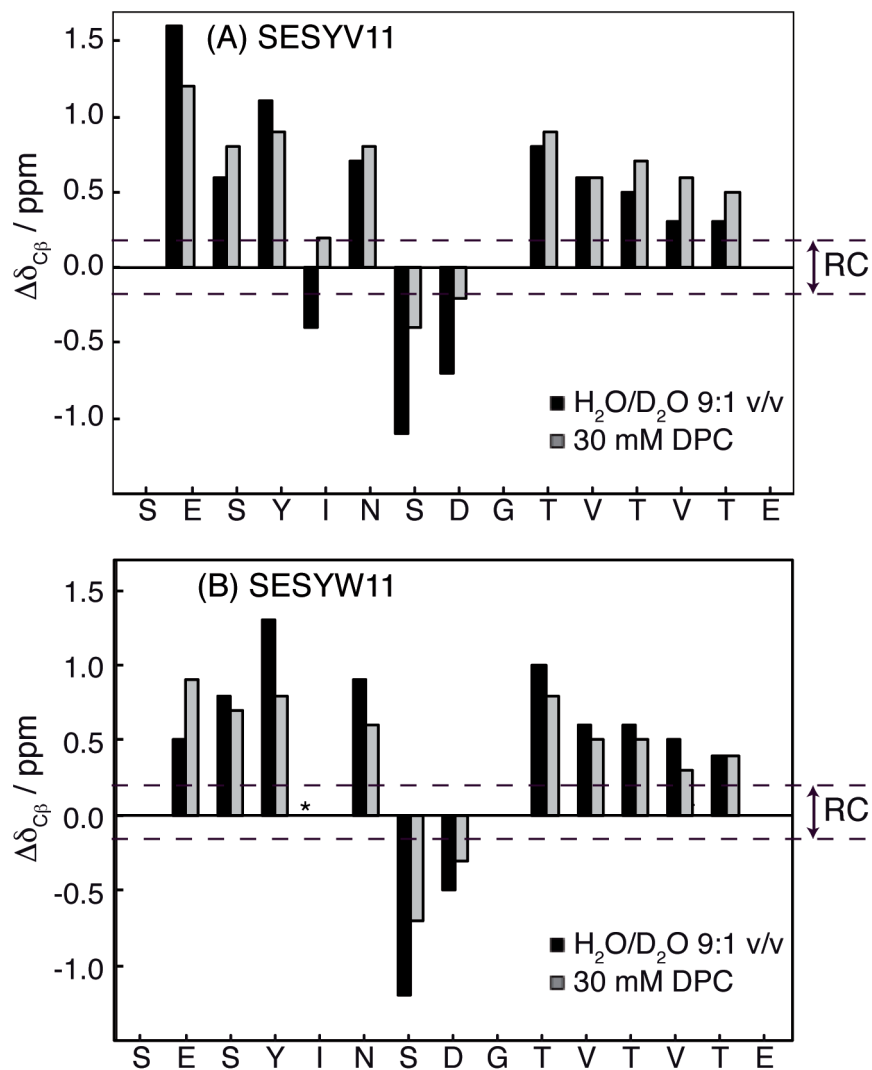

**Figure S8.** Bar plots of  $\Delta\delta_{C\beta}$  ( $\Delta\delta_{C\beta} = \delta_{C\beta}^{\text{observed}} - \delta_{C\beta}^{\text{RC}}$ , ppm) as a function of peptide sequence for SESYW11 (A) and SESYV11 (B) in H<sub>2</sub>O/D<sub>2</sub>O 9:1 v/v at pH 5.5 and 5°C (in black; data taken from Santiveri et al. *Protein Sci.* 2000 9, 2151-2160 & *J. Biomol. NMR* 2001, 19, 331-345), and in 30 mM DPC-d<sub>38</sub> at pH 5.5 and 25°C (in grey).  $\delta_{C\beta}^{\text{RC}}$  values were taken from Wishart et al., *J. Biomol. NMR* 1995, 5, 67-81. The N- and C-terminal residues are not shown. The discontinuous lines indicate the random coil (RC) range, and the asterisks that the corresponding  $\delta_{C\beta}$  values were not determined.

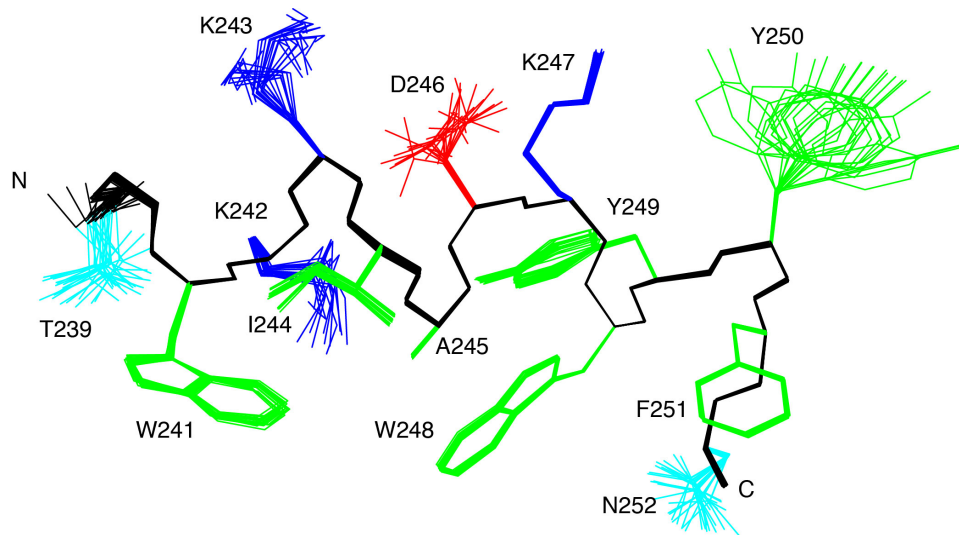

**Figure S9. Structure of LytA<sub>239-252</sub> in SDS micelles.** Ensemble of the 20 lowest target function structures overlaid onto the backbone atoms (black). Positively charged residues are in blue, negatively charged in red, Asn and Thr in cyan, and aromatic and hydrophobic in green. The amino and carboxylate termini are labelled by 'N' and 'C', respectively.

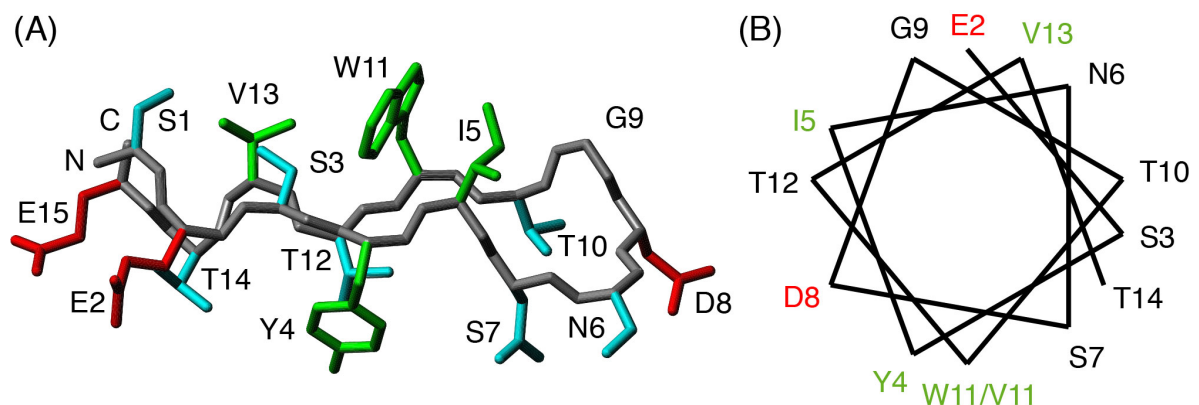

**Figure S10. Distribution of aromatic/hydrophobic (green) and polar/charged (cyan/red) side chains in (A) the SESYW11  $\beta$ -hairpin structure (Santiveri, Rico et al. 2000), and (B) a putative helix for peptides SESYW11 represented as a helical wheel. In panel A, the amino and carboxylate termini are labelled by 'N' and 'C', respectively.**

**Table S1.**  $^1\text{H}$  and  $^{13}\text{C}$  chemical shifts (ppm from DSS) of LytA<sub>239-252</sub> under different solvent conditions at pH 3.0 and 25 °C. “nd” stands for not determined. <sup>a</sup>Measured at 35°C

| Condition                                      |                                                    | H <sub>2</sub> O/D <sub>2</sub> O | 30 %               | 0.45 mM             | 30 mM               | 30 mM               | 0.2 mM              |
|------------------------------------------------|----------------------------------------------------|-----------------------------------|--------------------|---------------------|---------------------|---------------------|---------------------|
|                                                |                                                    | 9:1 (v/v)                         | TFE-d <sub>3</sub> | DPC-d <sub>38</sub> | DPC-d <sub>38</sub> | SDS-d <sub>25</sub> | SDS-d <sub>25</sub> |
| Peptide structure                              |                                                    | $\beta$ -hairpin                  | $\beta$ -hairpin   | $\beta$ -hairpin    | $\alpha$ -helix     | $\alpha$ -helix     | $\beta$ -hairpin    |
| Residue                                        | Resonance                                          |                                   |                    |                     |                     |                     |                     |
| Thr 239                                        | C <sub><math>\alpha</math></sub> H                 | 3.90                              | 3.96               | 3.88                | 3.85                | 3.89                | 3.88                |
|                                                | <sup>13</sup> C <sub><math>\alpha</math></sub>     | 61.2                              | 61.8               | 61.6                | 63.6                | 63.7                | 61.4                |
|                                                | C <sub><math>\beta</math></sub> H                  | 4.07                              | 4.11               | 4.04                | 4.01                | 4.07                | 4.05                |
|                                                | <sup>13</sup> C <sub><math>\beta</math></sub>      | 69.5                              | 69.7               | 69.8                | 68.5                | 69.1                | 69.8                |
|                                                | C <sub><math>\gamma</math></sub> H <sub>3</sub>    | 1.33                              | 1.38               | 1.32                | 1.14                | 1.15                | 1.33                |
|                                                | <sup>13</sup> C <sub><math>\gamma</math></sub>     | 21.4                              | 21.6               | 21.7                | 21.0                | 21.3                | 21.6                |
|                                                | Gly 240                                            | H <sub>N</sub>                    | 8.54               | 8.57                | 8.56                | 9.02                | 8.65                |
| C <sub><math>\alpha\alpha'</math></sub> H      |                                                    | 3.69, 4.48                        | 3.73, 4.45         | 3.68, 4.47          | 3.92, 4.18          | 3.93, 4.07          | 3.66, 4.50          |
| <sup>13</sup> C <sub><math>\alpha</math></sub> |                                                    | 44.5                              | 44.7               | 44.5                | 45.5                | 46.4                | 44.6                |
| Trp 241                                        | H <sub>N</sub>                                     | 8.69                              | 8.45               | 8.72                | 8.39                | 7.85                | 8.70                |
|                                                | C <sub><math>\alpha</math></sub> H                 | 5.45                              | 5.51               | 5.43                | 4.47                | 4.46                | 5.44                |
|                                                | <sup>13</sup> C <sub><math>\alpha</math></sub>     | 57.5                              | 57.6               | 57.7                | 59.2                | 59.1                | 57.7                |
|                                                | C <sub><math>\beta</math></sub> H                  | 3.19, 3.51                        | 3.20, 3.56         | 3.19, 3.49          | 3.27, 3.29          | 3.32, 3.32          | 3.18, 3.50          |
|                                                | <sup>13</sup> C <sub><math>\beta</math></sub>      | 31.1                              | 31.5               | 31.3                | 29.1 <sup>a</sup>   | 29.2                | 31.3                |
|                                                | C <sub><math>\delta 1</math></sub> H               | 7.41                              | 7.40               | 7.42                | 7.44                | 7.40                | 7.43                |
|                                                | <sup>13</sup> C <sub><math>\delta 1</math></sub>   | 127.3                             | 127.1              | 127.6               | 127.7               | 127.8               | 127.4               |
|                                                | N <sub><math>\epsilon 1</math></sub> H             | 10.21                             | 9.96               | 10.25               | 10.70               | 10.00               | 10.22               |
|                                                | C <sub><math>\epsilon 3</math></sub> H             | 7.68                              | 7.72               | 7.66                | 7.41                | 7.44                | 7.68                |
|                                                | <sup>13</sup> C <sub><math>\epsilon 3</math></sub> | 120.5                             | 120.8              | 120.7               | 120.7               | 120.6               | 120.6               |
|                                                | C <sub><math>\zeta 3</math></sub> H                | 7.03                              | 7.05               | 7.02                | 6.91                | 6.94                | 7.04                |
|                                                | <sup>13</sup> C <sub><math>\zeta 3</math></sub>    | 122.1                             | 122.1              | 122.3               | 121.4               | 121.7               | 122.3               |
|                                                | C <sub><math>\eta 2</math></sub> H                 | 7.20                              | 7.18               | 7.19                | 7.07                | 7.09                | 7.21                |
|                                                | <sup>13</sup> C <sub><math>\eta 2</math></sub>     | 124.9                             | 124.7              | 125.1               | 124.1               | 124.4               | 125.1               |
| Lys 242                                        | C <sub><math>\zeta 2</math></sub> H                | 7.34                              | 7.33               | 7.35                | 7.48                | 7.48                | 7.35                |
|                                                | <sup>13</sup> C <sub><math>\zeta 2</math></sub>    | 115.0                             | 114.8              | 115.2               | 115.0               | 114.9               | 115.2               |
|                                                | H <sub>N</sub>                                     | 9.92                              | 9.92               | 9.98                | 8.31                | 7.74                | 9.90                |
|                                                | C <sub><math>\alpha</math></sub> H                 | 4.86                              | 4.86               | 4.86                | 3.82                | 3.84                | 4.86                |
|                                                | <sup>13</sup> C <sub><math>\alpha</math></sub>     | 55.9                              | 55.9               | 56.0                | 59.5                | 59.2                | 56.1                |
|                                                | C <sub><math>\beta\beta'</math></sub> H            | 1.90, 1.90                        | 1.90, 1.94         | 1.85, 1.91          | 1.62, 1.73          | 1.60, 1.74          | 1.86, 1.92          |
|                                                | <sup>13</sup> C <sub><math>\beta</math></sub>      | 36.9                              | 37.0               | 37.1                | 31.8 <sup>a</sup>   | 32.1                | 37.1                |
|                                                | C <sub><math>\gamma\gamma'</math></sub> H          | 1.43, 1.43                        | 1.44, 1.44         | 1.41, 1.41          | 1.08, 1.14          | 1.07, 1.07          | 1.42, 1.42          |
|                                                | <sup>13</sup> C <sub><math>\gamma</math></sub>     | 25.0                              | 25.1               | 25.2                | 24.8 <sup>a</sup>   | 25.2                | 25.2                |
|                                                | C <sub><math>\delta\delta'</math></sub> H          | 1.47, 1.54                        | 1.53, 1.63         | 1.47, 1.53          | 1.62, 1.62          | 1.60, 1.60          | 1.46, 1.53          |
|                                                | <sup>13</sup> C <sub><math>\delta</math></sub>     | 29.2                              | 29.0               | 29.3                | 28.7                | 29.2                | 29.3                |
|                                                | C <sub><math>\epsilon\epsilon'</math></sub> H      | 2.74, 2.74                        | 2.81, 2.81         | 2.74, 2.74          | 2.92, 2.92          | 2.94, 2.94          | 2.72, 2.72          |
|                                                | <sup>13</sup> C <sub><math>\epsilon</math></sub>   | 41.7                              | 42.0               | 41.9                | 41.6                | 42.3                | 41.9                |
|                                                | N <sub><math>\zeta</math></sub> H <sub>3</sub>     | nd                                | nd                 | 7.39                | 7.74                | 7.43                | 7.40                |
| Lys 243                                        | H <sub>N</sub>                                     | 8.51                              | 8.32               | 8.52                | 7.68                | 7.72                | 8.53                |
|                                                | C <sub><math>\alpha</math></sub> H                 | 4.47                              | 4.53               | 4.45                | 4.11                | 4.11                | 4.46                |
|                                                | <sup>13</sup> C <sub><math>\alpha</math></sub>     | 55.2                              | 55.4               | 55.3                | 58.0                | 58.6                | 55.4                |
|                                                | C <sub><math>\beta\beta'</math></sub> H            | -0.19, 1.18                       | -0.10, 1.25        | -0.19, 1.18         | 1.83, 1.83          | 1.87, 1.87          | -0.25, 1.17         |
|                                                | <sup>13</sup> C <sub><math>\beta</math></sub>      | 32.1                              | 32.3               | 32.3                | 31.8 <sup>a</sup>   | 32.2                | 32.2                |
|                                                | C <sub><math>\gamma\gamma'</math></sub> H          | -0.04, 0.60                       | 0.08, 0.71         | -0.05, 0.60         | 1.42, 1.42          | 1.45, 1.50          | -0.07, 0.58         |
|                                                | <sup>13</sup> C <sub><math>\gamma</math></sub>     | 24.5                              | 24.7               | 24.8                | 24.5 <sup>a</sup>   | 25.2                | 24.7                |
|                                                | C <sub><math>\delta\delta'</math></sub> H          | 1.15, 1.15                        | 1.20, 1.20         | 1.16, 1.16          | 1.69, 1.69          | 1.71, 1.71          | 1.13, 1.13          |
|                                                | <sup>13</sup> C <sub><math>\delta</math></sub>     | 29.1                              | 29.3               | 29.4                | 28.5                | 29.2                | 29.3                |
|                                                | C <sub><math>\epsilon\epsilon'</math></sub> H      | 2.50, 2.62                        | 2.59, 2.69         | 2.49, 2.62          | 2.96, 2.96          | 2.95, 2.95          | 2.48, 2.61          |
|                                                | <sup>13</sup> C <sub><math>\epsilon</math></sub>   | 41.5                              | 41.8               | 41.9                | 41.4                | 42.3                | 41.6                |
| N <sub><math>\zeta</math></sub> H <sub>3</sub> | 7.48                                               | 7.54                              | 7.48               | nd                  | 7.43                | 7.48                |                     |

| <b>Condition</b>         |                                | H <sub>2</sub> O/D <sub>2</sub> O | 30 %               | 0.45 mM             | 30 mM               | 30 mM               | 0.2 mM              |
|--------------------------|--------------------------------|-----------------------------------|--------------------|---------------------|---------------------|---------------------|---------------------|
|                          |                                | 9:1 (v/v)                         | TFE-d <sub>3</sub> | DPC-d <sub>38</sub> | DPC-d <sub>38</sub> | SDS-d <sub>25</sub> | SDS-d <sub>25</sub> |
| <b>Peptide structure</b> |                                | β-hairpin                         | β-hairpin          | β-hairpin           | α-helix             | α-helix             | β-hairpin           |
| <b>Residue</b>           | <b>Resonance</b>               |                                   |                    |                     |                     |                     |                     |
| Ile 244                  | H <sub>N</sub>                 | 9.06                              | 9.04               | 9.09                | 7.60                | 7.62                | 9.07                |
|                          | C <sub>α</sub> H               | 4.17                              | 4.18               | 4.15                | 3.86                | 3.91                | 4.15                |
|                          | <sup>13</sup> C <sub>α</sub>   | 60.9                              | 61.1               | 61.3                | 60.9                | 61.4                | 61.1                |
|                          | C <sub>β</sub> H               | 1.95                              | 2.00               | 1.94                | 2.03                | 2.09                | 1.94                |
|                          | <sup>13</sup> C <sub>β</sub>   | 39.7                              | 39.7               | 39.9                | 37.6                | 38.2                | 39.9                |
|                          | C <sub>γ2</sub> H <sub>3</sub> | 0.88                              | 0.90               | 0.88                | 0.93                | 1.01                | 0.88                |
|                          | <sup>13</sup> C <sub>γ2</sub>  | 17                                | 16.7               | 17.3                | 17.4                | 18.0                | 17.2                |
| Ala 245                  | C <sub>γγ1</sub> H             | 1.10, 1.50                        | 1.12, 1.54         | 1.10, 1.50          | 1.20, 1.63          | 1.29, 1.68          | 1.10, 1.50          |
|                          | <sup>13</sup> C <sub>γ1</sub>  | 27.1                              | 27.2               | 27.3                | 28.2                | 28.6                | 27.2                |
|                          | C <sub>δ1</sub> H <sub>3</sub> | 0.76                              | 0.78               | 0.76                | 0.80                | 0.92                | 0.75                |
|                          | <sup>13</sup> C <sub>δ1</sub>  | 12.9                              | 12.5               | 13.2                | 12.9                | 13.4                | 13.1                |
|                          | H <sub>N</sub>                 | 9.20                              | 8.97               | 9.23                | 8.26                | 8.07                | 9.23                |
|                          | C <sub>α</sub> H               | 3.93                              | 3.89               | 3.94                | 4.09                | 4.12                | 3.92                |
|                          | <sup>13</sup> C <sub>α</sub>   | 53.7                              | 54.0               | 54.0                | 54.4                | 54.8                | 53.9                |
| Asp 246                  | C <sub>β</sub> H <sub>3</sub>  | 1.49                              | 1.54               | 1.49                | 1.54                | 1.53                | 1.49                |
|                          | <sup>13</sup> C <sub>β</sub>   | 16.8                              | 16.6               | 17.1                | 18.1                | 18.6                | 17.0                |
|                          | H <sub>N</sub>                 | 8.52                              | 8.47               | 8.53                | 8.44                | 8.21                | 8.52                |
|                          | C <sub>α</sub> H               | 4.33                              | 4.43               | 4.32                | 4.63                | 4.63                | 4.31                |
|                          | <sup>13</sup> C <sub>α</sub>   | 54.2                              | 54.0               | 54.5                | 55.1                | nd                  | 54.5                |
| Lys 247                  | C <sub>ββ</sub> H              | 2.92, 3.03                        | 3.00, 3.00         | 2.91, 3.01          | 2.98, 2.98          | 2.97, 3.02          | 2.90, 3.00          |
|                          | <sup>13</sup> C <sub>β</sub>   | 38.8                              | 38.6               | 39.1                | 37.8                | 37.8                | 39.2                |
|                          | H <sub>N</sub>                 | 7.88                              | 7.94               | 7.87                | 7.80                | 7.79                | 7.89                |
|                          | C <sub>α</sub> H               | 4.62                              | 4.63               | 4.60                | 4.19                | 4.17                | 4.61                |
|                          | <sup>13</sup> C <sub>α</sub>   | 55.2                              | 55.5               | 55.3                | 57.5                | 57.8                | 55.3                |
|                          | C <sub>ββ</sub> H              | 1.75, 1.75                        | 1.75, 1.84         | 1.72, 1.77          | 1.82, 1.90          | 1.74, 1.84          | 1.71, 1.76          |
|                          | <sup>13</sup> C <sub>β</sub>   | 36.0                              | 36.1               | 36.2                | 32.0 <sup>a</sup>   | 32.2                | 36.3                |
| Trp 248                  | C <sub>γγ</sub> H              | 1.27, 1.45                        | 1.32, 1.50         | 1.26, 1.45          | 1.28, 1.42          | 1.27, 1.37          | 1.27, 1.46          |
|                          | <sup>13</sup> C <sub>γ</sub>   | 25.2                              | 25.3               | 25.4                | 24.4 <sup>a</sup>   | 24.8                | 25.4                |
|                          | C <sub>δδ</sub> H              | 1.73, 1.73                        | 1.77, 1.77         | 1.72, 1.72          | 1.62, 1.62          | 1.59, 1.59          | 1.71, 1.71          |
|                          | <sup>13</sup> C <sub>δ</sub>   | 29.0                              | 29.1               | 29.3                | 28.5                | 28.9                | 29.1                |
|                          | C <sub>εε</sub> H              | 2.99, 2.99                        | 3.03, 3.03         | 2.99, 2.99          | 2.85, 2.85          | 2.90, 2.90          | 2.99, 2.99          |
|                          | <sup>13</sup> C <sub>ε</sub>   | 42.1                              | 42.4               | 42.5                | 41.4                | 42.4                | 42.3                |
|                          | N <sub>ε</sub> H <sub>3</sub>  | 7.56                              | 7.63               | 7.57                | 7.72                | 7.47                | 7.56                |
|                          | H <sub>N</sub>                 | 8.39                              | 8.19               | 8.40                | 7.99                | 7.96                | 8.41                |
|                          | C <sub>α</sub> H               | 5.07                              | 5.13               | 5.04                | 4.50                | 4.57                | 5.06                |
|                          | <sup>13</sup> C <sub>α</sub>   | 57.4                              | 57.5               | 57.5                | 58.5                | 58.0                | 57.5                |
| Trp 248                  | C <sub>ββ</sub> H              | 2.99, 3.31                        | 3.02, 3.37         | 3.01, 3.30          | 3.24, 3.36          | 3.26, 3.37          | 2.99, 3.31          |
|                          | <sup>13</sup> C <sub>β</sub>   | 30.9                              | 31.1               | 31.1                | 29.4 <sup>a</sup>   | 30.0                | 31.1                |
|                          | C <sub>δ1</sub> H              | 7.22                              | 7.21               | 7.21                | 7.14                | 7.03                | 7.21                |
|                          | <sup>13</sup> C <sub>δ1</sub>  | 127.2                             | 127.1              | 127.5               | 126.8               | 126.9               | 127.1               |
|                          | N <sub>ε1</sub> H              | 10.11                             | 9.96               | 10.13               | 10.51               | 9.89                | 10.12               |
|                          | C <sub>ε3</sub> H              | 7.63                              | 7.66               | 7.62                | 7.54                | 7.53                | 7.63                |
|                          | <sup>13</sup> C <sub>ε3</sub>  | 120.1                             | 120.5              | 120.3               | 120.8               | 120.8               | 120.2               |
|                          | C <sub>ζ3</sub> H              | 7.08                              | 7.09               | 7.07                | 6.97                | 6.99                | 7.10                |
|                          | <sup>13</sup> C <sub>ζ3</sub>  | 122.1                             | 122.1              | 122.4               | 121.6               | 121.9               | 122.3               |
|                          | C <sub>η2</sub> H              | 7.29                              | 7.26               | 7.27                | 7.08                | 7.11                | 7.31                |
|                          | <sup>13</sup> C <sub>η2</sub>  | 124.8                             | 124.6              | 125.0               | 124.0               | 124.5               | 125.0               |
|                          | C <sub>ζ2</sub> H              | 7.50                              | 7.49               | 7.50                | 7.46                | 7.46                | 7.51                |
|                          | <sup>13</sup> C <sub>ζ2</sub>  | 115.0                             | 114.8              | 115.2               | 114.8               | 114.8               | 115.2               |

| <b>Condition</b>             |                                | H <sub>2</sub> O/D <sub>2</sub> O | 30 %               | 0.45 mM             | 30 mM               | 30 mM               | 0.2 mM              |
|------------------------------|--------------------------------|-----------------------------------|--------------------|---------------------|---------------------|---------------------|---------------------|
|                              |                                | 9:1 (v/v)                         | TFE-d <sub>3</sub> | DPC-d <sub>38</sub> | DPC-d <sub>38</sub> | SDS-d <sub>25</sub> | SDS-d <sub>25</sub> |
| <b>Peptide structure</b>     |                                | β-hairpin                         | β-hairpin          | β-hairpin           | α-helix             | α-helix             | β-hairpin           |
| <b>Residue</b>               | <b>Resonance</b>               |                                   |                    |                     |                     |                     |                     |
| Tyr 249                      | H <sub>N</sub>                 | 9.45                              | 9.45               | 9.49                | 8.01                | 7.90                | 9.44                |
|                              | C <sub>α</sub> H               | 4.81                              | nd                 | nd                  | 4.12                | 4.23                | nd                  |
|                              | <sup>13</sup> C <sub>α</sub>   | 57.5                              | nd                 | nd                  | 59.6                | 59.4                | nd                  |
|                              | C <sub>ββ</sub> H              | 2.77, 2.77                        | 2.78, 2.84         | 2.75, 2.75          | 2.78, 2.90          | 2.89, 2.89          | 2.76, 2.76          |
|                              | <sup>13</sup> C <sub>β</sub>   | 42.6                              | 42.7               | 42.7                | 38.6 <sup>a</sup>   | 38.5                | 42.9                |
|                              | C <sub>δδ</sub> H              | 7.16, 7.16                        | 7.15, 7.15         | 7.15, 7.15          | 6.60, 6.60          | 6.86, 6.86          | 7.18, 7.18          |
|                              | <sup>13</sup> C <sub>δ</sub>   | 133.8                             | 133.7              | 134.0               | 133.2               | 133.3               | 134.0               |
|                              | C <sub>εε</sub> H              | 6.91, 6.91                        | 6.90, 6.90         | 6.90, 6.90          | 6.70, 6.70          | 6.80, 6.80          | 6.92, 6.92          |
|                              | <sup>13</sup> C <sub>ε</sub>   | 118.2                             | 118.2              | 118.5               | 118.3               | 118.4               | 118.4               |
|                              | Tyr 250                        | H <sub>N</sub>                    | 8.46               | 8.17                | 8.48                | 7.62                | 7.47                |
| C <sub>α</sub> H             |                                | 4.09                              | 4.23               | 4.08                | 4.24                | 4.23                | 4.06                |
| <sup>13</sup> C <sub>α</sub> |                                | 57.4                              | 57.5               | 57.8                | 58.5                | 59.3                | 57.6                |
| C <sub>ββ</sub> H            |                                | 0.94, 2.18                        | 1.16, 2.25         | 0.92, 2.19          | 2.70, 2.88          | 2.74, 2.81          | 0.87, 2.16          |
| <sup>13</sup> C <sub>β</sub> |                                | 38.5                              | 38.8               | 38.8                | 38.0 <sup>a</sup>   | 38.4                | 38.7                |
| C <sub>δδ</sub> H            |                                | 5.78, 5.78                        | 5.87, 5.87         | 5.78, 5.78          | 7.02, 7.02          | 6.84, 6.84          | 5.75, 5.75          |
| <sup>13</sup> C <sub>δ</sub> |                                | 132.6                             | 132.8              | 132.8               | 133.4               | 133.3               | 132.7               |
| C <sub>εε</sub> H            |                                | 6.54, 6.54                        | 6.55, 6.55         | 6.55, 6.55          | 6.82, 6.82          | 6.77, 6.77          | 6.54, 6.54          |
| <sup>13</sup> C <sub>ε</sub> |                                | 117.5                             | 117.6              | 117.8               | 118.4               | 118.4               | 117.6               |
| Phe 251                      |                                | H <sub>N</sub>                    | 7.77               | 7.93                | 7.76                | 7.61                | 7.62                |
|                              | C <sub>α</sub> H               | 4.46                              | 4.48               | 4.45                | 4.51                | 4.45                | 4.44                |
|                              | <sup>13</sup> C <sub>α</sub>   | 56.8                              | 57.0               | 56.9                | 57.3                | 58.3                | 57.0                |
|                              | C <sub>ββ</sub> H              | 2.75, 3.01                        | 2.78, 3.02         | 2.75, 3.01          | 3.03, 3.18          | 2.98, 3.16          | 2.73, 3.00          |
|                              | <sup>13</sup> C <sub>β</sub>   | 40.3                              | 40.3               | 40.4                | 39.0                | 39.9                | 40.4                |
|                              | C <sub>δδ</sub> H              | 7.26, 7.26                        | 7.27, 7.27         | 7.25, 7.25          | 7.28, 7.28          | 7.32, 7.32          | 7.29, 7.29          |
|                              | <sup>13</sup> C <sub>δ</sub>   | 132.1                             | 132.1              | 132.3               | 132.4               | 132.4               | 132.3               |
|                              | C <sub>εε</sub> H              | 7.09, 7.09                        | 7.06, 7.06         | 7.08, 7.08          | 7.20, 7.20          | 7.25, 7.25          | 7.10, 7.10          |
|                              | <sup>13</sup> C <sub>ε</sub>   | 129.3                             | 129.2              | 129.5               | 129.7               | 129.9               | 129.4               |
|                              | C <sub>ζ</sub> H               | 7.25                              | 7.24               | 7.24, 7.24          | 7.28                | 7.33                | 7.25                |
| <sup>13</sup> C <sub>ζ</sub> | 131.3                          | 131.2                             | 131.5              | 131.4               | 131.5               | 131.5               |                     |
| Asn 252                      | H <sub>N</sub>                 | 8.20                              | 8.08               | 8.20                | 7.98                | 7.96                | 8.25                |
|                              | C <sub>α</sub> H               | 4.38                              | 4.45               | 4.37                | 4.56                | 4.58                | 4.34                |
|                              | <sup>13</sup> C <sub>α</sub>   | 54.5                              | 54.4               | 54.9                | 52.1                | 51.3                | 55.0                |
|                              | C <sub>ββ</sub> H              | 2.68, 2.77                        | 2.70, 2.80         | 2.67, 2.77          | 2.61, 2.71          | 2.43, 2.59          | 2.66, 2.77          |
|                              | <sup>13</sup> C <sub>β</sub>   | 39.5                              | 39.6               | 39.8                | 39.0                | 39.3                | 39.8                |
|                              | N <sub>δδ</sub> H <sub>2</sub> | 6.95, 7.58                        | 6.86, 7.58         | 6.95, 7.60          | 6.75, 7.44          | 6.62, 7.15          | 6.97, 7.61          |

**Table S2.** Structural statistics parameters for the ensemble of the 20 lowest target function conformers calculated for peptide LytA<sub>239-252</sub> in aqueous solution and in micelles. <sup>a</sup> Close contacts are H atoms at distance <1.6 Å and heavy atoms at distance < 2.2 Å. <sup>b</sup>  $\chi_2$  ( $\chi_{21}$  in I244) range is also < 10°. <sup>c</sup>  $\chi_2$  ( $\chi_{21}$  in I244) range is < 30°. <sup>d</sup>  $\chi_3$  &  $\chi_4$  ranges are also < 10°.

|                                             | Aqueous solution                                                                                                | DPC micelles                                                                                              | SDS micelles                                                                                                            |
|---------------------------------------------|-----------------------------------------------------------------------------------------------------------------|-----------------------------------------------------------------------------------------------------------|-------------------------------------------------------------------------------------------------------------------------|
| <b>Number of distance restraints</b>        |                                                                                                                 |                                                                                                           |                                                                                                                         |
| Intraresidue ( $i - j = 0$ )                | 39                                                                                                              | 75                                                                                                        | 93                                                                                                                      |
| Sequential ( $ i - j  = 1$ )                | 23                                                                                                              | 45                                                                                                        | 65                                                                                                                      |
| Medium range ( $1 <  i - j  < 5$ )          | 23                                                                                                              | 36                                                                                                        | 79                                                                                                                      |
| Long range ( $ i - j  \geq 5$ )             | 87                                                                                                              | 0                                                                                                         | 0                                                                                                                       |
| Total number                                | 172                                                                                                             | 156                                                                                                       | 237                                                                                                                     |
| Averaged total number per residue           | 12.3                                                                                                            | 11.1                                                                                                      | 16.9                                                                                                                    |
| <b>Number of dihedral angle constraints</b> |                                                                                                                 |                                                                                                           |                                                                                                                         |
| Number of restricted $\phi$ angles          | 12                                                                                                              | 12                                                                                                        | 12                                                                                                                      |
| Number of restricted $\psi$ angles          | 12                                                                                                              | 12                                                                                                        | 11                                                                                                                      |
| Total number                                | 24                                                                                                              | 24                                                                                                        | 23                                                                                                                      |
| <b>Maximum violations per structure</b>     |                                                                                                                 |                                                                                                           |                                                                                                                         |
| Distance (Å)                                | 0.12                                                                                                            | 0.00                                                                                                      | 0.00                                                                                                                    |
| Dihedral angle (°)                          | 0.4                                                                                                             | 0.0                                                                                                       | 0.1                                                                                                                     |
| Number of close contacts <sup>a</sup>       | 0                                                                                                               | 0                                                                                                         | 0                                                                                                                       |
| <b>Deviations from ideal geometry</b>       |                                                                                                                 |                                                                                                           |                                                                                                                         |
| RMSD for Bond angles (°)                    | 0.2                                                                                                             | 0.2                                                                                                       | 0.2                                                                                                                     |
| RMSD for Bond lengths (Å)                   | 0.001                                                                                                           | 0.001                                                                                                     | 0.001                                                                                                                   |
| <b>Pairwise RMSD (Å)</b>                    |                                                                                                                 |                                                                                                           |                                                                                                                         |
| Backbone atoms                              | 0.3 ± 0.1                                                                                                       | 0.6 ± 0.2                                                                                                 | 0.2 ± 0.1                                                                                                               |
| All heavy atoms                             | 1.0 ± 0.1                                                                                                       | 1.4 ± 0.4                                                                                                 | 0.9 ± 0.2                                                                                                               |
| <b>Residues with ordered side chains</b>    |                                                                                                                 |                                                                                                           |                                                                                                                         |
| $\chi_1$ range < 10°                        | W241 <sup>b</sup> , K243 <sup>b</sup> ,<br>I244 <sup>b</sup> , K247,<br>W248 <sup>b</sup> , Y249,<br>Y250, F251 | T239 <sup>b</sup> , W241 <sup>b</sup> ,<br>I244 <sup>b</sup> , K247 <sup>b</sup> ,<br>W248, Y249,<br>F251 | W241 <sup>b</sup> , K242 <sup>b</sup> ,<br>I244 <sup>c</sup> , K247 <sup>d</sup> ,<br>W248 <sup>b</sup> , Y249,<br>F251 |
| $\chi_1$ range < 30°                        | K242 <sup>c</sup> , D246                                                                                        | K242, K243, Y250                                                                                          | K243, D246, N252                                                                                                        |
| <b>Ramachandran plot (%)</b>                |                                                                                                                 |                                                                                                           |                                                                                                                         |
| Most favoured regions                       | 72.7                                                                                                            | 100                                                                                                       | 90.9                                                                                                                    |
| Additionally allowed regions                | 27.3                                                                                                            | 0                                                                                                         | 9.1                                                                                                                     |
| Generously allowed regions                  | 0                                                                                                               | 0                                                                                                         | 0                                                                                                                       |
| Disallowed regions                          | 0                                                                                                               | 0                                                                                                         | 0                                                                                                                       |

**Table S3.**  $^1\text{H}$  and  $^{13}\text{C}$  chemical shifts (ppm, from DSS) for peptide SESYW11 in 30 mM DPC-d38 in  $\text{H}_2\text{O}/\text{D}_2\text{O}$  9:1 (v/v) at pH 5.5 and 25 °C. “nd” stands for not determined.

| Residue | HN   | $^{13}\text{C}_\alpha$ | $\text{C}_\alpha\text{H}$ | $^{13}\text{C}_\beta$ | $\text{C}_\beta\text{H}$ | Others                                                                                                                                                                                                                                                                                                                                                                                                  |
|---------|------|------------------------|---------------------------|-----------------------|--------------------------|---------------------------------------------------------------------------------------------------------------------------------------------------------------------------------------------------------------------------------------------------------------------------------------------------------------------------------------------------------------------------------------------------------|
| Ser 1   |      | 57.4                   | 4.18                      | 63.1                  | 3.93, 3.98               |                                                                                                                                                                                                                                                                                                                                                                                                         |
| Glu 2   |      | 56.1                   | 4.48                      | 30.8                  | 1.90, 2.04               | $\text{C}_\gamma\text{H}$ 2.27, 2.27; $^{13}\text{C}_\gamma$ 35.8                                                                                                                                                                                                                                                                                                                                       |
| Ser 3   | 8.41 | nd                     | 4.43                      | 64.5                  | 3.75, 3.75               |                                                                                                                                                                                                                                                                                                                                                                                                         |
| Tyr 4   | 8.46 | nd                     | 4.72                      | 39.6                  | 2.89, 3.02               | $\text{C}_\delta\text{H}$ 6.99, 6.99; $^{13}\text{C}_\delta$ 133.7<br>$\text{C}_\epsilon\text{H}$ 6.75, 6.75; $^{13}\text{C}_\epsilon$ 118.3                                                                                                                                                                                                                                                            |
| Ile 5   | 8.02 | 60.5                   | 4.01                      | 38.8                  | 1.32                     | $\text{C}_{\gamma_1}\text{H}$ 0.79, 0.96; $^{13}\text{C}_{\gamma_1}$ 27.4<br>$\text{C}_{\gamma_2}\text{H}_3$ 0.72; $^{13}\text{C}_{\gamma_2}$ 16.9<br>$\text{C}_{\delta_1}\text{H}_3$ 0.62; $^{13}\text{C}_{\delta_1}$ 12.9                                                                                                                                                                             |
| Asn 6   | 8.55 | nd                     | nd                        | 39.5                  | 2.84, 2.84               | $\text{N}_\gamma\text{H}_2$ 6.90, 7.42                                                                                                                                                                                                                                                                                                                                                                  |
| Ser 7   | 8.66 | 60.1                   | 4.26                      | 63.1                  | 3.85, 3.92               |                                                                                                                                                                                                                                                                                                                                                                                                         |
| Asp 8   | 8.01 | nd                     | 4.61                      | 40.8                  | 2.67, 2.85               |                                                                                                                                                                                                                                                                                                                                                                                                         |
| Gly 9   | 8.15 | 45.5                   | 3.67, 4.09                |                       |                          |                                                                                                                                                                                                                                                                                                                                                                                                         |
| Thr 10  | 7.89 | 61.8                   | 4.36                      | 70.6                  | 4.19                     | $\text{C}_\gamma\text{H}_3$ 1.12; $^{13}\text{C}_\gamma$ 21.6                                                                                                                                                                                                                                                                                                                                           |
| Trp 11  | 8.46 | nd                     | 4.87                      | 30.1                  | 3.09, 3.18               | $\text{C}_{\delta_1}\text{H}$ 7.21; $^{13}\text{C}_{\delta_1}$ 127.3; $\text{N}_{\epsilon_1}\text{H}$ 10.1;<br>$\text{C}_{\epsilon_3}\text{H}$ 7.47; $^{13}\text{C}_{\epsilon_3}$ 120.9<br>$\text{C}_{\zeta_3}\text{H}$ 7.02; $^{13}\text{C}_{\zeta_3}$ 122.0<br>$\text{C}_{\eta_2}\text{H}$ 7.17; $^{13}\text{C}_{\eta_2}$ 124.6<br>$\text{C}_{\zeta_2}\text{H}$ 7.44; $^{13}\text{C}_{\zeta_2}$ 114.9 |
| Thr12   | 8.55 | 61.9                   | 4.34                      | 70.3                  | 3.75                     | $\text{C}_\gamma\text{H}_3$ 1.07; $^{13}\text{C}_\gamma$ 21.5                                                                                                                                                                                                                                                                                                                                           |
| Val 13  | 8.27 | 61.8                   | 4.38                      | 33.2                  | 2.02                     | $\text{C}_\gamma\text{H}_3$ 0.91, 0.91; $^{13}\text{C}_\gamma$ 20.6, 21.2                                                                                                                                                                                                                                                                                                                               |
| Thr14   | 8.46 | 61.5                   | 4.43                      | 70.2                  | 4.23                     | $\text{C}_\gamma\text{H}_3$ 1.20; $^{13}\text{C}_\gamma$ 21.5                                                                                                                                                                                                                                                                                                                                           |
| Glu 15  | 8.11 | 58.0                   | 4.14                      | 30.8                  | 1.89, 2.05               | $\text{C}_\gamma\text{H}$ 2.24, 2.24; $^{13}\text{C}_\gamma$ 35.9                                                                                                                                                                                                                                                                                                                                       |



**Table S4.**  $^1\text{H}$  and  $^{13}\text{C}$  chemical shifts (ppm, from DSS) for peptide SESYV11 in 30 mM DPC-d38 in  $\text{H}_2\text{O}/\text{D}_2\text{O}$  9:1 (v/v) at pH 5.5 and 25 °C. “nd” stands for not determined.

| Residue | HN   | $^{13}\text{C}_\alpha$ | $\text{C}_\alpha\text{H}$ | $^{13}\text{C}_\beta$ | $\text{C}_\beta\text{H}$ | Others                                                                                                                                                                                                                      |
|---------|------|------------------------|---------------------------|-----------------------|--------------------------|-----------------------------------------------------------------------------------------------------------------------------------------------------------------------------------------------------------------------------|
| Ser 1   |      | 57.6                   | 4.19                      | 63.4                  | 3.92, 3.98               |                                                                                                                                                                                                                             |
| Glu 2   | 8.78 | nd                     | 4.46                      | 31.1                  | 1.88, 2.00               | $\text{C}_\gamma\text{H}$ 2.25, 2.25; $^{13}\text{C}_\gamma$ 36.0                                                                                                                                                           |
| Ser 3   | 8.40 | nd                     | 4.70                      | 64.6                  | 3.71, 3.71               |                                                                                                                                                                                                                             |
| Tyr 4   | 8.43 | nd                     | 4.66                      | 39.7                  | 2.91, 3.01               | $\text{C}_\delta\text{H}$ 7.03, 7.03; $\text{C}_\epsilon\text{H}$ 6.78, 6.78                                                                                                                                                |
| Ile 5   | 8.09 | 60.9                   | 4.23                      | 39.0                  | 1.72                     | $\text{C}_{\gamma_1}\text{H}$ 1.07, 1.42; $^{13}\text{C}_{\gamma_1}$ 27.6<br>$\text{C}_{\gamma_2}\text{H}_3$ 0.86; $^{13}\text{C}_{\gamma_2}$ 17.5<br>$\text{C}_{\delta_1}\text{H}_3$ 0.79; $^{13}\text{C}_{\delta_1}$ 13.1 |
| Asn 6   | 8.64 | nd                     | 4.61                      | 39.7                  | 2.88, 2.88               | $\text{N}_\gamma\text{H}_2$ 7.03, 7.48                                                                                                                                                                                      |
| Ser 7   | 8.68 | 60.1                   | 4.31                      | 63.4                  | 3.87, 3.95               |                                                                                                                                                                                                                             |
| Asp 8   | 8.08 | nd                     | 4.61                      | 40.9                  | 2.70, 2.86               |                                                                                                                                                                                                                             |
| Gly 9   | 8.24 | 45.7                   | 3.76, 4.13                |                       |                          |                                                                                                                                                                                                                             |
| Thr 10  | 8.03 | 62.4                   | 4.33                      | 70.7                  | 4.20                     | $\text{C}_\gamma\text{H}_3$ 1.16; $^{13}\text{C}_\gamma$ 21.9                                                                                                                                                               |
| Val 11  | 8.32 | 61.7                   | 4.41                      | 33.5                  | 1.98                     | $\text{C}_\gamma\text{H}_3$ 0.86, 0.91; $^{13}\text{C}_\gamma$ 21.4, 20.3                                                                                                                                                   |
| Thr12   | 8.66 | 62.2                   | 4.39                      | 70.5                  | 3.89                     | $\text{C}_\gamma\text{H}_3$ 1.14; $^{13}\text{C}_\gamma$ 22.0                                                                                                                                                               |
| Val 13  | 8.42 | 62.2                   | 4.39                      | 33.5                  | 2.03                     | $\text{C}_\gamma\text{H}_3$ 0.90, 0.90; $^{13}\text{C}_\gamma$ 20.9, 20.9                                                                                                                                                   |
| Thr14   | 8.48 | 61.6                   | 4.42                      | 70.3                  | 4.21                     | $\text{C}_\gamma\text{H}_3$ 1.18; $^{13}\text{C}_\gamma$ 21.7                                                                                                                                                               |
| Glu 15  | 8.11 | 58.2                   | 4.13                      | 31.1                  | 1.89, 2.05               | $\text{C}_\gamma\text{H}$ 2.23, 2.23; $^{13}\text{C}_\gamma$ 36.2                                                                                                                                                           |
